# Supplementary material for: Cmah deficiency may lead to age-related hearing loss by influencing miRNA-PPAR mediated signaling pathway
Source: PeerJ. 2019 May 17;7:e6856. doi: 10.7717/peerj.6856 (PMC6526899; doi:10.7717/peerj.6856)
Supplement: Supplemental Information 2 [file peerj-07-6856-s002.xlsx]

## Sheet: 工作表 1
Gene_Symbol	logFC	P.Value	adj.P.Val	UP_DOWN	TF
Cd74	1.98747	0.000176937404651105	0.609231033265709	UP	-
Mylpf	-1.64635	0.000215518158735325	0.609231033265709	DOWN	-
Ifitm3	1.44192	0.000343885807388262	0.609231033265709	UP	-
Cidea	-2.01484	0.000362403140330891	0.609231033265709	DOWN	-
Ucp1	-2.11032	0.000396617941894254	0.609231033265709	DOWN	-
Hadhb	-1.52841	0.00049712579198365	0.609231033265709	DOWN	-
Nccrp1	1.3656	0.000526347392576884	0.609231033265709	UP	-
Tfrc	-1.24151	0.000769111141427776	0.609231033265709	DOWN	-
Aqp3	1.27691	0.000812006443823294	0.609231033265709	UP	-
Scnn1a	1.2374	0.000815075207628872	0.609231033265709	UP	-
Slfn1	1.57525	0.000879083483103682	0.609231033265709	UP	-
Rgs4	-1.21488	0.000915555342501851	0.609231033265709	DOWN	-
Per2	1.20861	0.000924171502498922	0.609231033265709	UP	-
Kl	1.84218	0.00104492919450264	0.609231033265709	UP	-
Acadvl	-1.28511	0.00107309731086646	0.609231033265709	DOWN	-
Sprr1a	1.63651	0.00128880262429106	0.609231033265709	UP	-
Acaa2	-1.59544	0.00132570158818303	0.609231033265709	DOWN	-
Cox7a1	-1.54272	0.00140078480916976	0.609231033265709	DOWN	-
Sdhb	-1.06375	0.00153029074101066	0.609231033265709	DOWN	-
Krt71	1.06395	0.00161174438213137	0.609231033265709	UP	-
Fos	1.36176	0.00165964075345734	0.609231033265709	UP	TF
Osr2	1.19302	0.00169250794088527	0.609231033265709	UP	TF
Mb	-1.05603	0.00179603283789934	0.609231033265709	DOWN	-
Ndufb9	-1.31674	0.00194593734873153	0.609231033265709	DOWN	-
G6b	1.28999	0.00196701865329163	0.609231033265709	UP	-
Lad1	1.02527	0.00207874072956628	0.609231033265709	UP	-
Lyrm5	-1.27968	0.00214744768201149	0.609231033265709	DOWN	-
Irgm2	1.04193	0.00219958691809416	0.609231033265709	UP	-
Fam83g	0.975864323434864	0.00223290713704906	0.609231033265709	UP	-
Kcne2	1.22727	0.00228551833531478	0.609231033265709	UP	-
Gfpt2	0.970936449947456	0.00231524020064587	0.609231033265709	UP	-
Ddx3y	-1.76783	0.00234291361632674	0.609231033265709	DOWN	-
Atp6v1a	-1.03167	0.00258817374689786	0.609231033265709	DOWN	-
Zfp106	-1.00148	0.00259944408436234	0.609231033265709	DOWN	TF
Mfap5	-0.986074653032135	0.00263816506850163	0.609231033265709	DOWN	-
Apoc1	-1.22185	0.00277464012242907	0.609231033265709	DOWN	-
Lgals3bp	1.07375	0.00290568423201775	0.609231033265709	UP	-
Aloxe3	1.134	0.00296714762227047	0.609231033265709	UP	-
Edn2	1.12565	0.00302345728032598	0.609231033265709	UP	-
Tmem154	0.978715	0.00310579983413681	0.609231033265709	UP	-
Cdsn	1.20116	0.00319971481907969	0.609231033265709	UP	-
Ush1c	0.966170496736742	0.00327772063145382	0.609231033265709	UP	-
Ccng1	-1.01341	0.00331020510590401	0.609231033265709	DOWN	-
Igfbp4	0.982874	0.00342198354060036	0.609231033265709	UP	-
Sowahb	0.958779065824468	0.00344705673272593	0.609231033265709	UP	-
Zfpm2	1.03825	0.00356549311059792	0.609231033265709	UP	TF
Clic6	1.1089	0.00356606217246683	0.609231033265709	UP	-
Socs3	1.23311	0.00363056568053674	0.609231033265709	UP	-
Wnt10a	0.999697646589709	0.00363447455791778	0.609231033265709	UP	-
Muc20	0.865755367253298	0.0037532449096242	0.609231033265709	UP	-
Acadm	-1.10136	0.00378814743841475	0.609231033265709	DOWN	-
Pip5k1b	1.01551	0.00380267580070395	0.609231033265709	UP	-
Oasl2	1.33311	0.00384378907342073	0.609231033265709	UP	-
Fbp2	-0.899111952283504	0.00386480476394021	0.609231033265709	DOWN	-
Ndufb5	-1.39626	0.00392829840726325	0.609231033265709	DOWN	-
Casp14	1.48186	0.00395327756548256	0.609231033265709	UP	-
Fh1	-0.921773134763836	0.00407641643153608	0.609231033265709	DOWN	-
Col17a1	1.04454	0.00434056045571735	0.609231033265709	UP	-
Slco4a1	0.892164566059731	0.00449017985042621	0.609231033265709	UP	-
Sdhd	-1.03862	0.0045487393623774	0.609231033265709	DOWN	-
Pdha1	-1.0174	0.00458127414649267	0.609231033265709	DOWN	-
2310002L09Rik	-0.857351773961368	0.00458376935068673	0.609231033265709	DOWN	-
Scd1	-1.05619	0.00463095033575994	0.609231033265709	DOWN	-
Tpbg	0.859410137189176	0.00474685197574845	0.609231033265709	UP	-
Chad	1.06532	0.00482089704797652	0.609231033265709	UP	-
Map3k6	0.836752740182222	0.00493537222637155	0.609231033265709	UP	-
Rgs5	-1.20033	0.00494429506426068	0.609231033265709	DOWN	-
Suclg1	-0.881113	0.00494759005378045	0.609231033265709	DOWN	-
Krt73	0.893712	0.0049968287989873	0.609231033265709	UP	-
Klhl24	-0.923387561152034	0.00505702528813717	0.609231033265709	DOWN	-
Psors1c2	0.811562030986886	0.00512964496918923	0.609231033265709	UP	-
Cxcl14	0.805608249296556	0.00516911405800046	0.609231033265709	UP	-
Ndufs2	-1.10309	0.00517037485756654	0.609231033265709	DOWN	-
Fermt2	-0.812948139370601	0.00523926232763336	0.609231033265709	DOWN	-
Alox12	1.00571	0.005317338204167	0.609231033265709	UP	-
Pyy	1.79462	0.00533287617677177	0.609231033265709	UP	-
Art3	-0.880595080571354	0.00535955873325017	0.609231033265709	DOWN	-
Oas2	1.08889	0.00537798203963441	0.609231033265709	UP	-
Etfb	-0.830534944950869	0.00545037292151543	0.609231033265709	DOWN	-
Rasl12	-0.991014086458566	0.00545926353884737	0.609231033265709	DOWN	-
P2ry6	0.950523134717954	0.00546461210931056	0.609231033265709	UP	-
Htr3b	-0.986031177738069	0.00549973417890691	0.609231033265709	DOWN	-
Itm2a	-0.995475096798313	0.00551116410538333	0.609231033265709	DOWN	-
Dbt	-0.878258925026494	0.005534037488138	0.609231033265709	DOWN	-
Pdhb	-1.07862	0.00561054511201584	0.609231033265709	DOWN	-
Rbfox3	0.921243315011135	0.00568600402462878	0.609231033265709	UP	-
Siglec1	0.805675909092619	0.00572743929877375	0.609231033265709	UP	-
Gpihbp1	-0.900611594845221	0.00582240331667881	0.609231033265709	DOWN	-
Renbp	0.982747961114511	0.00584900550597509	0.609231033265709	UP	-
Csf2ra	1.02598	0.00591615355416523	0.609231033265709	UP	-
Pkp1	1.15854	0.00603008459119668	0.609231033265709	UP	-
Ly6e	0.865427037307832	0.00604795030129946	0.609231033265709	UP	-
Slc13a4	1.06219	0.00610440896086935	0.609231033265709	UP	-
Eci1	-0.911629857502234	0.00615536456561792	0.609231033265709	DOWN	-
Mlf1	-1.06118	0.00622374455136003	0.609231033265709	DOWN	-
Rdh5	0.770149115377349	0.00634739110912458	0.609231033265709	UP	-
Plch2	0.766751	0.00647323514354801	0.609231033265709	UP	-
Cnksr3	0.858315665361105	0.00652709376066027	0.609231033265709	UP	-
Cox7b	-0.970460685051891	0.00679899036214318	0.609231033265709	DOWN	-
Foxq1	0.832511	0.00679938189251633	0.609231033265709	UP	TF
Zeb2	-0.912533538008533	0.00683674265980628	0.609231033265709	DOWN	TF
Lrtm1	-1.01502	0.00702101168435944	0.609231033265709	DOWN	-
Unc93b1	0.764114524613841	0.00704598411728383	0.609231033265709	UP	-
BC017158	0.780090885144465	0.00707027491315323	0.609231033265709	UP	-
Pou3f1	1.12081	0.00717955420848753	0.609231033265709	UP	TF
Npy	0.849670519173898	0.00718395196180485	0.609231033265709	UP	-
Slco2a1	0.879605195394521	0.00720297372573721	0.609231033265709	UP	-
Nudt7	-1.10599	0.00721942773268742	0.609231033265709	DOWN	-
4931406C07Rik	-0.836103567024797	0.00722859884866725	0.609231033265709	DOWN	-
Spon2	-0.963140652466969	0.00726080166809296	0.609231033265709	DOWN	-
Cox8b	-1.44042	0.00729154909988949	0.609231033265709	DOWN	-
Ndufb2	-1.26227	0.00760064219731777	0.609231033265709	DOWN	-
Phlda1	1.04021	0.00762828256938782	0.609231033265709	UP	-
En2	0.843742868936933	0.00766811452760921	0.609231033265709	UP	TF
Etfa	-0.854612629672235	0.00776894077435854	0.609231033265709	DOWN	-
Fkbp5	1.15645	0.00785131090460877	0.609231033265709	UP	-
Prph	-1.37397	0.00788168807421226	0.609231033265709	DOWN	-
Tmem70	-0.730017991904065	0.00795745963087358	0.609231033265709	DOWN	-
Mafg	0.839947	0.00805097534637144	0.609231033265709	UP	TF
Dock4	0.846519788523063	0.00805117340077927	0.609231033265709	UP	-
Irf2bp1	0.885960960769132	0.00805620426035789	0.609231033265709	UP	-
Pcdhb3	0.776371588030483	0.00808330296536643	0.609231033265709	UP	-
Ecm1	0.914563878890566	0.00816506720600565	0.609231033265709	UP	-
Htr3a	-0.959650628328542	0.0082160154556995	0.609231033265709	DOWN	-
Ganc	-0.786131242489745	0.00823067020861351	0.609231033265709	DOWN	-
Dld	-1.042	0.00825539845307154	0.609231033265709	DOWN	-
Dhcr24	-0.786913570757579	0.00826151396288009	0.609231033265709	DOWN	-
Mob3b	0.727798103279959	0.00836148896600998	0.609231033265709	UP	-
2310007B03Rik	0.732200745670042	0.00842324908600327	0.609231033265709	UP	-
Krt27	0.862581405564916	0.00843085115995432	0.609231033265709	UP	-
Pcca	-1.09874	0.00849581586268338	0.609231033265709	DOWN	-
Slc5a3	-1.05675	0.00866231585686776	0.609231033265709	DOWN	-
Plcg2	0.832565058097527	0.00873937190845731	0.609231033265709	UP	-
Nphp4	0.818996793807504	0.0087551675739473	0.609231033265709	UP	-
Alox5ap	1.37872	0.00879171552313771	0.609231033265709	UP	-
Car2	-0.872667997409802	0.0088810334209322	0.609231033265709	DOWN	-
Klk11	0.730082523686704	0.00891485837727106	0.609231033265709	UP	-
Lhx1	0.768268202454271	0.00892226371422682	0.609231033265709	UP	TF
Slc22a6	1.04235	0.00893745274030692	0.609231033265709	UP	-
Gltp	0.893430808955365	0.00904602476874414	0.609231033265709	UP	-
Otx2	0.756117696714144	0.00907918513612195	0.609231033265709	UP	TF
Ifngr2	-0.821297501955115	0.00930303516686489	0.609231033265709	DOWN	-
Nrg4	-0.849664570102658	0.00935133472624467	0.609231033265709	DOWN	-
Erdr1	0.889354409847932	0.00939794183239401	0.609231033265709	UP	-
Cldn4	0.795090635243515	0.0093986654982154	0.609231033265709	UP	-
Foxo1	0.817204127047168	0.00940136675529848	0.609231033265709	UP	TF
Cdc42ep5	0.966969915858069	0.00945026535314954	0.609231033265709	UP	-
Pglyrp1	0.959102536721598	0.00946686068558702	0.609231033265709	UP	-
Otx1	0.858742898779766	0.00947349688945035	0.609231033265709	UP	TF
Pak4	0.838806	0.00949263574320544	0.609231033265709	UP	-
Clic3	1.02616	0.00960735209363597	0.609231033265709	UP	-
Csrnp1	0.922412089675848	0.00964459988718877	0.609231033265709	UP	TF
Gm2893	-0.948955884894903	0.00967632900521951	0.609231033265709	DOWN	-
Uncx	1.14498	0.00978019988737612	0.609231033265709	UP	TF
Klf5	0.733703218063467	0.00980877423581815	0.609231033265709	UP	TF
Larp4b	-1.12895	0.00983767086845554	0.609231033265709	DOWN	-
Rin1	0.768609957503282	0.00986585829380847	0.609231033265709	UP	-
Syndig1l	0.872042266824822	0.00990677766102186	0.609231033265709	UP	-
Ahsp	-1.87624	0.00993312697031061	0.609231033265709	DOWN	-
Gyltl1b	0.790386391389029	0.0101145411342949	0.609231033265709	UP	-
Cd59a	-0.751096608419468	0.010118155318217	0.609231033265709	DOWN	-
Dnase1l3	0.955802307249122	0.0101598498314925	0.609231033265709	UP	-
Enpp2	0.851222320051465	0.0101910352755389	0.609231033265709	UP	-
Atp5h	-0.943270024031269	0.010196343571386	0.609231033265709	DOWN	-
Helz2	0.733589933786738	0.0102315688984379	0.609231033265709	UP	-
Pdcd4	-1.05222	0.0102660457121615	0.609231033265709	DOWN	-
Megf9	-0.691080321258263	0.0103197651204507	0.609231033265709	DOWN	-
Cycs	-0.809438239751118	0.0103704512861191	0.609231033265709	DOWN	-
Pml	0.900255435357559	0.0103895265374012	0.609231033265709	UP	-
Bcl6	0.732112498031097	0.0103938970078508	0.609231033265709	UP	TF
Kitl	-0.744516140039045	0.0104659787561776	0.609231033265709	DOWN	-
Prox1	0.731113863568755	0.0104894633014731	0.609231033265709	UP	TF
Calca	-0.836039	0.0105338104486236	0.609231033265709	DOWN	-
Nbl1	0.8086	0.0105681757532635	0.609231033265709	UP	-
D8Ertd82e	0.873424033289088	0.0106364178585635	0.609231033265709	UP	-
Murc	-0.951345811104338	0.0108488933822052	0.609231033265709	DOWN	-
Agpat3	-0.705986	0.010852915691033	0.609231033265709	DOWN	-
Ppp1r26	0.686071297197205	0.0108860727710236	0.609231033265709	UP	-
Cd47	0.715875691176798	0.0109039814374037	0.609231033265709	UP	-
Gata3	0.875160275901059	0.0109626	0.609231033265709	UP	TF
Coq9	-0.878993042267001	0.0109720104363004	0.609231033265709	DOWN	-
Hmgn5	-0.687730562504395	0.0110269	0.609231033265709	DOWN	-
Bcl11b	0.869720592387751	0.0111424772620468	0.609231033265709	UP	TF
Tfap2a	0.866916276800274	0.0111936028595889	0.609231033265709	UP	TF
Cib2	-1.06281	0.0112721375760125	0.609231033265709	DOWN	-
Tmie	0.734552191015066	0.0112851605264829	0.609231033265709	UP	-
Sod2	-0.716398095369233	0.0113444130094744	0.609231033265709	DOWN	-
Prr15l	0.699833823499595	0.0114001991534319	0.609231033265709	UP	-
Icam1	0.766571415932991	0.0114291557781776	0.609231033265709	UP	-
Ptgr2	-0.704203692746095	0.0114379067527508	0.609231033265709	DOWN	-
Foxa1	0.795134	0.0114682355566479	0.609231033265709	UP	TF
Cpt2	-0.835765065874301	0.011479441953608	0.609231033265709	DOWN	-
Vdr	0.813767103758932	0.0115266874905573	0.609231033265709	UP	TF
Krt10	1.13621	0.0115286086054467	0.609231033265709	UP	-
Sostdc1	1.27139	0.0115707930789727	0.609231033265709	UP	-
Ndufa5	-0.967355	0.011712548660981	0.609231033265709	DOWN	-
C1qtnf9	-0.993201821261317	0.0117446273773115	0.609231033265709	DOWN	-
Slc2a1	0.788266459724898	0.0118378027986657	0.609231033265709	UP	-
Csad	-0.810232990712595	0.0118884978695032	0.609231033265709	DOWN	-
Dusp14	0.691406220747402	0.0119240763437755	0.609231033265709	UP	-
Dynll1	0.687640622755131	0.0119964823885135	0.609231033265709	UP	-
Rbm47	0.706065533019831	0.0120000061420633	0.609231033265709	UP	-
Cldn5	-0.726326686615001	0.0120392570950011	0.609231033265709	DOWN	-
Ciart	0.868377991054099	0.0121226714720743	0.609231033265709	UP	-
Lypd3	1.51468	0.0121291067033675	0.609231033265709	UP	-
Pdk4	-0.659339169040901	0.0122319808235531	0.609231033265709	DOWN	-
Hr	0.766937569286565	0.0122728040438524	0.609231033265709	UP	-
Ndufs4	-1.10252	0.0123088682896901	0.609231033265709	DOWN	-
Pank3	-0.688397919419107	0.0123926409722548	0.609231033265709	DOWN	-
Tacstd2	1.13546	0.0124482292515755	0.609231033265709	UP	-
Uqcr11	-0.995423473486834	0.0125387	0.609231033265709	DOWN	-
Etfdh	-0.662095047345963	0.0125573183524307	0.609231033265709	DOWN	-
Plin5	-0.751959331226514	0.012600881501586	0.609231033265709	DOWN	-
Haus1	-0.762750751016902	0.0126210018188809	0.609231033265709	DOWN	-
Spsb1	0.689292379334599	0.0126412852643534	0.609231033265709	UP	-
Aldh3a1	0.732658873467431	0.0128193615705436	0.609231033265709	UP	-
Dnali1	0.781555886166547	0.0128895306890376	0.609231033265709	UP	-
Irf7	1.07698	0.0129108416182521	0.609231033265709	UP	TF
Ppl	0.962571	0.0129617544896716	0.609231033265709	UP	-
St8sia4	-0.707717384634087	0.0129809913227275	0.609231033265709	DOWN	-
Cdkn1b	-1.08764	0.013049855627337	0.609231033265709	DOWN	-
BC037034	0.666021680172299	0.0132068889862901	0.609231033265709	UP	-
Hist1h2ak	-0.780670024088153	0.0134440635307018	0.609231033265709	DOWN	-
Hacd1	-0.763889132651916	0.0135255540081904	0.609231033265709	DOWN	-
Snrnp70	-0.851004979730655	0.0137384974567011	0.609231033265709	DOWN	-
Bpifb5	0.842073038515949	0.0138127259730549	0.609231033265709	UP	-
Mettl22	-0.647799653599084	0.0138587372915743	0.609231033265709	DOWN	-
Cox6b2	0.858271393581395	0.0139172864560988	0.609231033265709	UP	-
Snx7	-0.792522582509511	0.0140970853257855	0.609231033265709	DOWN	-
1700029P11Rik	-0.757241258893292	0.0141366559329135	0.609231033265709	DOWN	-
Bnip2	-0.676055309230827	0.0141838511579711	0.609231033265709	DOWN	-
Kcnj12	-0.790914	0.0143118218014593	0.609231033265709	DOWN	-
Cacna2d1	-1.16351	0.0144206323824384	0.609231033265709	DOWN	-
Cdc16	-0.849218739551112	0.0144916124531227	0.609231033265709	DOWN	-
Csf1	0.779503724942506	0.0144976645892659	0.609231033265709	UP	-
Shisa5	0.635796426729498	0.0145224877779647	0.609231033265709	UP	-
Lypd1	0.820819	0.0145676579451015	0.609231033265709	UP	-
Syne1	-0.789631655233104	0.0146206792322452	0.609231033265709	DOWN	-
Sncg	-1.03375	0.0146279754224287	0.609231033265709	DOWN	-
Cxcr1	0.692348751002791	0.0146826584059017	0.609231033265709	UP	-
Tmem184a	0.733172136591438	0.0146873726071154	0.609231033265709	UP	-
Pccb	-0.701553198791722	0.0147265489683509	0.609231033265709	DOWN	-
Padi1	0.797011607661699	0.0147981275350434	0.609231033265709	UP	-
Slc16a8	0.696004665931578	0.0150035355943205	0.609231033265709	UP	-
AI314180	-0.833633927412871	0.0151782445764469	0.609231033265709	DOWN	-
Sorbs3	0.676446	0.0151877763828525	0.609231033265709	UP	-
Mrpl12	-0.652093548268633	0.0153476904967407	0.609231033265709	DOWN	-
Fam83h	0.628653816488433	0.0155617568809185	0.609231033265709	UP	-
Rfx2	0.845880909535324	0.0156966408194696	0.609231033265709	UP	TF
Dos	0.650301369873316	0.0158570586543411	0.609231033265709	UP	-
Trim8	0.696045312512496	0.0158601198777708	0.609231033265709	UP	-
C2cd3	0.950078591588552	0.015925955009802	0.609231033265709	UP	-
Slpi	1.21348	0.0159287513399909	0.609231033265709	UP	-
Zfp36	0.851595441615965	0.0159983665769667	0.609231033265709	UP	-
Ptn	-0.923303805691135	0.016033281259737	0.609231033265709	DOWN	-
Lpar6	-0.825551949730219	0.0160457773855428	0.609231033265709	DOWN	-
Rasgrf1	0.780137097302699	0.0161059301353992	0.609231033265709	UP	-
Csdc2	0.841958528479591	0.0161993160514366	0.609231033265709	UP	-
Stra6	0.949901376642269	0.0162434897269674	0.609231033265709	UP	-
Oxld1	-0.689021201992636	0.0162533713570033	0.609231033265709	DOWN	-
Kank1	0.618664492521698	0.0162777765896594	0.609231033265709	UP	-
Akr1b3	-0.942608129129562	0.0163276274777409	0.609231033265709	DOWN	-
Zfp750	0.756785278246844	0.0163982165305422	0.609231033265709	UP	TF
Aldh1a7	-0.743613993490584	0.0164781930065211	0.609231033265709	DOWN	-
Sema3f	0.721724335169299	0.0165337131458361	0.609231033265709	UP	-
Eci2	-0.959412336477316	0.0165599710634842	0.609231033265709	DOWN	-
Camk2n1	0.670514120233798	0.0165736	0.609231033265709	UP	-
Eltd1	-0.631486	0.016593	0.609231033265709	DOWN	-
Fundc2	-0.690130621032595	0.016729346920827	0.609231033265709	DOWN	-
Bmp7	0.712153507614221	0.0167483131125205	0.609231033265709	UP	-
Kcnj15	0.739616	0.0167592965770175	0.609231033265709	UP	-
Tiam1	0.742586967987834	0.0168047037650665	0.609231033265709	UP	-
Ak2	-0.626582494521998	0.0169008514051421	0.609231033265709	DOWN	-
Meis1	0.704244250709133	0.0169344109976624	0.609231033265709	UP	TF
Nrros	0.624737731791768	0.0169433856249311	0.609231033265709	UP	-
Srsf5	-0.740287753708134	0.0169603428145715	0.609231033265709	DOWN	-
Lace1	-0.689748695805747	0.0169653122200226	0.609231033265709	DOWN	-
Ubl3	0.642446402810465	0.0170922282949706	0.609231033265709	UP	-
Slc17a9	0.644223764623874	0.0171020958013116	0.609231033265709	UP	-
Lep	-1.48886	0.0172016112301537	0.609231033265709	DOWN	-
Dgat2	-1.24195	0.0172122270472841	0.609231033265709	DOWN	-
Itga2b	0.701547438934152	0.017254088522554	0.609231033265709	UP	-
Spata2l	0.605980927645112	0.0173016724171916	0.609231033265709	UP	-
Nemf	-0.661410605710234	0.017305494930458	0.609231033265709	DOWN	-
Pkia	-0.922152269493868	0.0175008779330216	0.609231033265709	DOWN	-
Lor	0.910995941219262	0.0175193145844671	0.609231033265709	UP	-
Gp5	0.881574180793364	0.0175423222571064	0.609231033265709	UP	-
Gpx4	-1.31508	0.0175537638199594	0.609231033265709	DOWN	-
Fabp3	-1.01885	0.0177425582682299	0.609231033265709	DOWN	-
Dalrd3	0.608738525318186	0.0178075871548016	0.609231033265709	UP	-
Serping1	0.623566618429466	0.0178879601378835	0.609231033265709	UP	-
Spryd7	-0.630234774163699	0.0180765448324931	0.609231033265709	DOWN	-
Ddx5	-0.780850759595111	0.0182078206992111	0.609231033265709	DOWN	-
Slc6a17	0.721486824839097	0.018289577599486	0.609231033265709	UP	-
Tpi1	-0.607477768834803	0.018339280032344	0.609231033265709	DOWN	-
Cox6c	-1.0692	0.0183644044274247	0.609231033265709	DOWN	-
Usp21	0.751931396563778	0.018413722604229	0.609231033265709	UP	-
Gpx3	0.648984884882229	0.018511076226416	0.609231033265709	UP	-
Ovol1	0.824363506378099	0.0185759879350211	0.609231033265709	UP	TF
Pitpnm3	0.619806	0.0186087026550704	0.609231033265709	UP	-
Tor1b	-0.687051223256839	0.0186171870200381	0.609231033265709	DOWN	-
Acbd5	-0.785867476152748	0.0187017559938565	0.609231033265709	DOWN	-
Acsl5	-0.743700877531767	0.0187188204890446	0.609231033265709	DOWN	-
Acat2	-0.798581115841991	0.0188417382409186	0.609231033265709	DOWN	-
Paip2	-0.919603959317302	0.0188635669333701	0.609231033265709	DOWN	-
Fmo1	-0.823468025235466	0.0189664491402907	0.609231033265709	DOWN	-
Gh	1.73884	0.0190016573071813	0.609231033265709	UP	-
Tmod4	-0.916939520804602	0.0191038357367421	0.609231033265709	DOWN	-
Dnaaf3	0.639645169177528	0.0191530734589487	0.609231033265709	UP	-
Pparg	-0.897793799834213	0.0192752474179039	0.609231033265709	DOWN	TF
Tet2	-0.617215244286273	0.0193432063285571	0.609231033265709	DOWN	TF
Ccdc114	0.641289937067066	0.0193568754394898	0.609231033265709	UP	-
Slc25a20	-0.899007456049228	0.0193607992359773	0.609231033265709	DOWN	-
Gyg	-0.785651115322278	0.019413844477109	0.609231033265709	DOWN	-
Plagl2	0.704194718293298	0.0194925655821383	0.609231033265709	UP	TF
Laptm5	0.868651033901832	0.0195005100608349	0.609231033265709	UP	-
Elf3	0.587500095407669	0.0195534158327264	0.609231033265709	UP	TF
Atxn3	-0.645992419559909	0.0195667	0.609231033265709	DOWN	-
Arrdc2	0.653310780823748	0.0196149654386259	0.609231033265709	UP	-
Abca4	0.594896490338413	0.0196540660455373	0.609231033265709	UP	-
Prkx	0.603525656352932	0.0197182411839419	0.609231033265709	UP	-
Myt1l	0.795636496107914	0.019899692124758	0.609231033265709	UP	TF
Atp1b2	1.15797	0.0199920042600946	0.609231033265709	UP	-
Mocs2	-0.974901	0.0201525629006519	0.609231033265709	DOWN	-
Itgb4	0.680033226075332	0.0202083341869481	0.609231033265709	UP	-
Mcc	0.666823973967107	0.0202631951804024	0.609231033265709	UP	-
Ndufb4	-0.881188175953625	0.0203143807799164	0.609231033265709	DOWN	-
Odf3b	0.619730755189892	0.0203647892792575	0.609231033265709	UP	-
Zic4	0.676686911813016	0.0204365635232644	0.609231033265709	UP	TF
Srl	-0.911473090273888	0.0205029248349675	0.609231033265709	DOWN	-
Trpv4	0.663744746318993	0.0205493317043826	0.609231033265709	UP	-
Lbp	0.630141069193237	0.0205816263509382	0.609231033265709	UP	-
Acadl	-0.711487532382755	0.020591586461912	0.609231033265709	DOWN	-
Wfdc5	0.641130082993343	0.0206812051702022	0.609231033265709	UP	-
Psmb5	-0.658775804216029	0.0207529820704811	0.609231033265709	DOWN	-
Ppp1cb	-0.905214172466505	0.0207541361878769	0.609231033265709	DOWN	-
Echs1	-0.829544902212101	0.0207587402905551	0.609231033265709	DOWN	-
Pld4	0.576477145249643	0.0208198266760697	0.609231033265709	UP	-
Asnsd1	-0.614597331494924	0.0208921442132926	0.609231033265709	DOWN	-
Crispld2	1.01886	0.0210483094499046	0.609231033265709	UP	-
Gldc	0.576023194176735	0.0211771660835603	0.609231033265709	UP	-
Cobl	0.616803894526938	0.0211976367228864	0.609231033265709	UP	-
Cops5	-1.00239	0.0213084372404663	0.609231033265709	DOWN	-
Megf10	0.593223838417566	0.0214252160233817	0.609231033265709	UP	-
Kng1	-0.882848	0.0214650480489638	0.609231033265709	DOWN	-
5330417C22Rik	0.586704807034439	0.0214845114718553	0.609231033265709	UP	-
Igfbp5	0.589681372799497	0.0216611790479155	0.609231033265709	UP	-
Dctn1	0.843539111757283	0.021662366756953	0.609231033265709	UP	-
Folr1	0.662428990656564	0.0216869022337006	0.609231033265709	UP	-
Litaf	0.673056009208933	0.021696418194599	0.609231033265709	UP	-
Hdac4	0.608622740119233	0.0217346159253933	0.609231033265709	UP	-
Urah	1.10402	0.0219075891293625	0.609231033265709	UP	-
Pla2g7	-0.717036	0.0219224070258109	0.609231033265709	DOWN	-
Hs3st1	0.624833	0.0219457955617243	0.609231033265709	UP	-
Dlk2	0.598413706061595	0.0219701507985483	0.609231033265709	UP	-
Ndufa9	-0.871143643125102	0.022005317357369	0.609231033265709	DOWN	-
Klf2	1.00649	0.0222266645564827	0.609231033265709	UP	TF
Mpl	0.783907845122152	0.0223290491657812	0.609231033265709	UP	-
Pmpcb	-0.817398837010008	0.022329127693212	0.609231033265709	DOWN	-
Tmem98	0.615376172875867	0.0223411493909055	0.609231033265709	UP	-
Sprr1b	1.43742	0.0223811735795697	0.609231033265709	UP	-
Trp63	1.08129	0.0224168089054667	0.609231033265709	UP	TF
Car3	-1.26387	0.0224377330682723	0.609231033265709	DOWN	-
Nsd1	-0.666236309824809	0.0225722190610341	0.609231033265709	DOWN	-
Lcn2	0.892283999983454	0.0226519981879688	0.609231033265709	UP	-
Cox17	-0.665838212104635	0.0226748062930445	0.609231033265709	DOWN	-
Lamb3	0.608227165135702	0.0226786773553898	0.609231033265709	UP	-
Per1	0.690469144993283	0.0227839584796607	0.609231033265709	UP	-
Ltb4r1	0.869064655546517	0.0228188442161941	0.609231033265709	UP	-
Eps8l2	0.588578342074924	0.0228307248427246	0.609231033265709	UP	-
1700021F05Rik	-0.635973990347836	0.0229503343914283	0.609231033265709	DOWN	-
Reg3g	-0.884478	0.0229844588107054	0.609231033265709	DOWN	-
Serpina3n	0.613511448427765	0.0229911217880937	0.609231033265709	UP	-
Abcd2	-1.00197	0.0230162354496357	0.609231033265709	DOWN	-
Ivns1abp	-0.970542740918029	0.0231886869307057	0.609231033265709	DOWN	-
Cct8	-0.650883947698736	0.0233451837637404	0.609231033265709	DOWN	-
Eprs	-0.638579138424247	0.0234039109099588	0.609231033265709	DOWN	-
Oasl1	0.718154456531162	0.0234854046165889	0.609231033265709	UP	-
Idh3g	-0.940876272046434	0.0236564411264627	0.609231033265709	DOWN	-
Idh1	-1.00612	0.0236641252751666	0.609231033265709	DOWN	-
Lama1	0.648113	0.0236734764992449	0.609231033265709	UP	-
Fam181b	0.604027790488497	0.0236971902692144	0.609231033265709	UP	-
Ppp1r3c	-0.595366087098602	0.0237240324608123	0.609231033265709	DOWN	-
Cav1	-0.832285030016735	0.0237447969622252	0.609231033265709	DOWN	-
Hirip3	0.596712854941544	0.0237957575713811	0.609231033265709	UP	-
Scp2	-1.08441	0.0238247739725583	0.609231033265709	DOWN	-
Ptpn22	0.651068905136025	0.0238283374658427	0.609231033265709	UP	-
Ndufa1	-0.900398893442968	0.0239034739553873	0.609231033265709	DOWN	-
Ndufs8	-1.04016	0.0240809713511762	0.609231033265709	DOWN	-
Prdx3	-0.833700238813448	0.0240944307763052	0.609231033265709	DOWN	-
Tfap2b	0.578936	0.0241274221735774	0.609231033265709	UP	TF
Cldn3	0.724176321100955	0.0241600523813379	0.609231033265709	UP	-
Fap	-0.821864151892245	0.024189012027146	0.609231033265709	DOWN	-
Wnt7b	0.640435496275817	0.0242792235907886	0.609231033265709	UP	-
Dcpp3	-1.80957	0.0242978494648399	0.609231033265709	DOWN	-
Wnt3a	0.565631380669012	0.0243842884720162	0.609231033265709	UP	-
Itih4	0.584257770043291	0.0243959136248352	0.609231033265709	UP	-
Gm128	0.612027364772944	0.024411378468949	0.609231033265709	UP	-
Epb4.1l1	0.823079946698899	0.0244997744979441	0.609231033265709	UP	-
Uqcrh	-1.18327	0.0246062205436211	0.609231033265709	DOWN	-
Cds1	0.557110177260099	0.0246276627524008	0.609231033265709	UP	-
Hist1h2be	0.594047	0.0246703886886862	0.609231033265709	UP	-
Chodl	-0.976664576028984	0.0246954117290203	0.609231033265709	DOWN	-
Ifitm2	0.594079692304098	0.0248255322976667	0.609231033265709	UP	-
Myd88	0.572366841161731	0.0248480146241416	0.609231033265709	UP	-
Fbln1	0.824087	0.0250143215067695	0.609231033265709	UP	-
Cwh43	0.633085978387185	0.0250257584777919	0.609231033265709	UP	-
Tnrc6c	0.598396537840466	0.0250448051281092	0.609231033265709	UP	-
Rgs9	0.628233753590172	0.0251651382556165	0.609231033265709	UP	-
Aldh6a1	-0.831184571957733	0.0251959559568131	0.609231033265709	DOWN	-
Ndufs3	-0.667657026695969	0.0253369289620722	0.609231033265709	DOWN	-
Rtn4rl1	0.733664070554604	0.0254441304861978	0.609231033265709	UP	-
Elavl2	-0.701240318799332	0.025447678500765	0.609231033265709	DOWN	-
C4b	0.920316568790531	0.0254889457450949	0.609231033265709	UP	-
Errfi1	0.557196873803231	0.0256698602636166	0.609231033265709	UP	-
Pcp2	0.584601351650732	0.0256906350958794	0.609231033265709	UP	-
Prlr	0.667866	0.0258702717312418	0.609231033265709	UP	-
Ghitm	-0.595723638546032	0.0260671148397967	0.609231033265709	DOWN	-
Smek2	-0.669821935613335	0.026115093326202	0.609231033265709	DOWN	-
Acadsb	-0.928650337021102	0.026174028897675	0.609231033265709	DOWN	-
Mrps15	-0.681426356636037	0.0262128546874861	0.609231033265709	DOWN	-
Ireb2	-0.636331266868535	0.0262165404234418	0.609231033265709	DOWN	-
Scamp3	0.846927552762972	0.0262192811030969	0.609231033265709	UP	-
Nfkbid	0.578626245973429	0.0263637262331394	0.609231033265709	UP	TF
Fosb	0.916177013058986	0.0263691374368368	0.609231033265709	UP	TF
Wisp2	0.726583932794746	0.0264925786208251	0.609231033265709	UP	-
Ngp	0.691453262596873	0.0265070334228627	0.609231033265709	UP	-
Dok4	-0.703709658306871	0.0265367769268988	0.609231033265709	DOWN	-
Bcl11a	0.868559604620779	0.0265408171358749	0.609231033265709	UP	TF
Aamdc	-0.626888137433637	0.0268630125662589	0.609231033265709	DOWN	-
1810011O10Rik	-0.701369450661575	0.026924187021096	0.609231033265709	DOWN	-
Cldn23	0.552523240451348	0.0269438538697666	0.609231033265709	UP	-
Oaz2	-0.696096645771121	0.0269500607288149	0.609231033265709	DOWN	-
Ablim2	0.627129476276933	0.0269616429438893	0.609231033265709	UP	-
Col9a2	0.622682964855877	0.0270143711238141	0.609231033265709	UP	-
Tprn	0.599583	0.0270829373737545	0.609231033265709	UP	-
Selp	0.858368229296909	0.0272108043086822	0.609231033265709	UP	-
Ndufb8	-0.689141027594635	0.0272111203004965	0.609231033265709	DOWN	-
Hspd1	-0.724248735123736	0.0272668933752203	0.609231033265709	DOWN	-
Ephb1	0.659906340210135	0.0272851044256007	0.609231033265709	UP	-
Tmem106a	0.617381625635435	0.027313369414211	0.609231033265709	UP	-
Gstm1	0.768013881475297	0.0273392745906023	0.609231033265709	UP	-
Scn10a	-1.01976	0.0273594253782779	0.609231033265709	DOWN	-
Itga7	-0.965562027155133	0.0275354085699512	0.609231033265709	DOWN	-
Clic4	0.545557131819835	0.0275817089177125	0.609231033265709	UP	-
Pdxp	0.622333665917265	0.0275852089824601	0.609231033265709	UP	-
Gad1	0.548966227613832	0.0276662114461998	0.609231033265709	UP	-
Cyc1	-0.720805468696202	0.0276773933078634	0.609231033265709	DOWN	-
Dnajc15	-0.586928886424367	0.0277271684012079	0.609231033265709	DOWN	-
E2f4	0.693562905310369	0.0277289624752634	0.609231033265709	UP	TF
Aldh18a1	0.616942601369899	0.0277491161225738	0.609231033265709	UP	-
Vdac3	-0.580312	0.0278059485170656	0.609231033265709	DOWN	-
Slc15a3	0.739371704283296	0.0279749652533877	0.609231033265709	UP	-
Fus	-1.05963	0.027977406812766	0.609231033265709	DOWN	-
Ncald	-0.622640484021675	0.0280129314466621	0.609231033265709	DOWN	-
Foxn2	-0.541813383264509	0.0280279440954736	0.609231033265709	DOWN	TF
Lmntd2	0.545701577838979	0.0280516866244081	0.609231033265709	UP	-
Tac1	-0.595713	0.0280980148008866	0.609231033265709	DOWN	-
Fam198b	-0.719591015644808	0.0281070095526517	0.609231033265709	DOWN	-
Ptp4a2	-0.532171553396403	0.0281595522355979	0.609231033265709	DOWN	-
Cit	-0.563936020543466	0.0282316381478964	0.609231033265709	DOWN	-
Epgn	0.827793246526305	0.0282534541115262	0.609231033265709	UP	-
Prom2	0.682124075509479	0.0282711285410032	0.609231033265709	UP	-
Dhrs7	-0.536415	0.0282921676794628	0.609231033265709	DOWN	-
Hspa2	0.531841832602798	0.0283070206757851	0.609231033265709	UP	-
Cx3cl1	0.802904457890485	0.0283531318678302	0.609231033265709	UP	-
Mrps21	-0.663215854498703	0.0284042905097489	0.609231033265709	DOWN	-
Spred1	0.620075	0.0284527655242218	0.609231033265709	UP	-
Itln1	-0.637344790378836	0.0284953204235579	0.609231033265709	DOWN	-
Dmrt3	0.652928927849326	0.0285349472318963	0.609231033265709	UP	TF
Slc7a8	0.613558942603861	0.0285691994992333	0.609231033265709	UP	-
Entpd4	0.543165793643597	0.0286430324495417	0.609231033265709	UP	-
Ctsk	-0.652523265701903	0.0287583235711637	0.609231033265709	DOWN	-
Vip	-1.34481	0.0287639238759696	0.609231033265709	DOWN	-
Tgm1	0.582710370618979	0.0287768607754011	0.609231033265709	UP	-
Msrb2	-0.536162928295013	0.0288142647864099	0.609231033265709	DOWN	-
Tubb4a	0.976048364990132	0.0288827712043642	0.609231033265709	UP	-
Pcyox1l	0.610586176590028	0.0290139	0.609231033265709	UP	-
Casq1	-1.31141	0.0290588903061532	0.609231033265709	DOWN	-
Immt	-0.553983468227368	0.0291143995107657	0.609231033265709	DOWN	-
Cmbl	-0.646365968408767	0.0291161493244713	0.609231033265709	DOWN	-
Csrp3	-0.722221155378667	0.0291601971146394	0.609231033265709	DOWN	-
Wnt6	0.679030330124523	0.0292320435578212	0.609231033265709	UP	-
Atpaf2	-0.593925827755859	0.0294952106160305	0.609231033265709	DOWN	-
Tnni2	-0.562857021601001	0.0295118108549968	0.609231033265709	DOWN	-
Akr1e1	-0.731657981968544	0.0295171516932438	0.609231033265709	DOWN	-
Alox12e	1.12553	0.029587846485053	0.609231033265709	UP	-
Pon3	-0.985805731722405	0.0297312118806286	0.609231033265709	DOWN	-
Chgb	0.644109068473067	0.0297406966496014	0.609231033265709	UP	-
Mrpl42	-1.04782	0.0297846568307311	0.609231033265709	DOWN	-
Sirt3	-0.527212265258736	0.0298261368676972	0.609231033265709	DOWN	-
Crls1	-0.664493779790849	0.0298281638232078	0.609231033265709	DOWN	-
Kat7	0.569721258315749	0.0298688965015693	0.609231033265709	UP	TF
Usmg5	-0.859409420039772	0.0299223444819933	0.609231033265709	DOWN	-
Cbx5	-0.804636722847874	0.0299313259458004	0.609231033265709	DOWN	-
Golga4	-0.629137813594928	0.0299738909050626	0.609231033265709	DOWN	-
Mrpl53	-0.564483040513881	0.0300024880924325	0.609231033265709	DOWN	-
Fgf10	0.580297	0.030041515685433	0.609231033265709	UP	-
Sumo3	-0.896533215832667	0.0300598836079557	0.609231033265709	DOWN	-
Tnfsf13b	0.608022008008733	0.0300782426451026	0.609231033265709	UP	-
H2-Eb1	1.10135	0.0301167246913995	0.609231033265709	UP	-
Gpcpd1	-0.543153402167297	0.0301327834059355	0.609231033265709	DOWN	-
Scamp2	0.565463	0.0301828659150645	0.609231033265709	UP	-
Tctn2	0.714998783544339	0.0301971783211923	0.609231033265709	UP	-
Chtf8	0.547599070443739	0.0304967090907651	0.609231033265709	UP	-
Ndufb3	-0.968954449590269	0.0305068206038472	0.609231033265709	DOWN	-
Mrpl30	-1.08684	0.0305665293396525	0.609231033265709	DOWN	-
Slc4a2	0.584827498004896	0.0305745030472881	0.609231033265709	UP	-
Nit2	-0.604286420927747	0.0308484260534095	0.609231033265709	DOWN	-
Nell2	-0.529539527579285	0.0309547511641085	0.609231033265709	DOWN	-
Twist2	0.539824070054615	0.0310276599745948	0.609231033265709	UP	TF
Arhgef18	0.559941825771731	0.0310289711445878	0.609231033265709	UP	-
Oas1g	0.921287150346181	0.0310483713455472	0.609231033265709	UP	-
Rora	-0.763517393278668	0.0310743212820075	0.609231033265709	DOWN	TF
Ttc22	0.520838641717886	0.0312743149279045	0.609231033265709	UP	-
Junb	0.962296917179772	0.0313292785128011	0.609231033265709	UP	TF
Gpd2	-0.803484333095244	0.0313628059943772	0.609231033265709	DOWN	-
Ctgf	0.728234837062031	0.031370313268889	0.609231033265709	UP	-
Ndufa8	-0.586324770140068	0.0314325571510313	0.609231033265709	DOWN	-
BC028528	-0.532731645171072	0.031437190695223	0.609231033265709	DOWN	-
Lpin2	-0.548897520834568	0.0315386808891498	0.609231033265709	DOWN	-
Ddx6	-0.566435395456975	0.0316488611273524	0.609231033265709	DOWN	-
Mx2	0.827082259530235	0.0317071217190238	0.609231033265709	UP	-
Cd1d1	-1.07346	0.0317262827073868	0.609231033265709	DOWN	-
Mrpl20	-1.04724	0.031729523715016	0.609231033265709	DOWN	-
Sox21	0.773132123091199	0.031758348031396	0.609231033265709	UP	TF
Snrpd3	-0.572839410969068	0.0317636304493188	0.609231033265709	DOWN	-
Cd37	0.795059176948442	0.0317734095794655	0.609231033265709	UP	-
Stc2	0.558965568959889	0.031888018200541	0.609231033265709	UP	-
Cdkn2c	-0.615170760866015	0.0319348230693914	0.609231033265709	DOWN	-
Osm	0.601248792920708	0.0319734514410327	0.609231033265709	UP	-
Pmp2	-0.557018215198674	0.0320167845416013	0.609231033265709	DOWN	-
Fam155a	0.531347	0.0320284430814622	0.609231033265709	UP	-
G0s2	-0.936275837200509	0.0320561337832115	0.609231033265709	DOWN	-
Rasl11a	0.528365883232263	0.032069086745897	0.609231033265709	UP	-
Stfa2	0.550907587513512	0.0320783346459093	0.609231033265709	UP	-
Ehmt1	-0.592843852363671	0.0321746333809797	0.609231033265709	DOWN	-
Grhl1	0.638031419777568	0.0322455453793286	0.609231033265709	UP	TF
Gp1bb	0.591722616013845	0.032247226655306	0.609231033265709	UP	-
B3gnt3	0.570352081969113	0.0323330136208681	0.609231033265709	UP	-
Ndufa3	-0.846714724640667	0.0323397019098911	0.609231033265709	DOWN	-
Coq6	-0.550265167420124	0.0324182265522679	0.609231033265709	DOWN	-
Zc3h3	0.713712865157991	0.0325182387420853	0.609231033265709	UP	TF
Clcnkb	0.788710723660472	0.0325213593979043	0.609231033265709	UP	-
Slc6a2	0.532904958947276	0.0325313541307265	0.609231033265709	UP	-
Mllt3	-0.540390992999534	0.032558552030066	0.609231033265709	DOWN	TF
Irak3	0.536615511473237	0.0325994395840261	0.609231033265709	UP	-
Bud13	0.753516209632262	0.0326188998768786	0.609231033265709	UP	-
Ola1	-0.610830192674827	0.0327148219318753	0.609231033265709	DOWN	-
Apol9b	0.645358438120912	0.0327597900641612	0.609231033265709	UP	-
Gprc5a	0.510548731211062	0.0327816274276316	0.609231033265709	UP	-
Letmd1	-0.844725716430487	0.0328077708661675	0.609231033265709	DOWN	-
Gspt2	0.590228871561888	0.0328407978264962	0.609231033265709	UP	-
Xrcc6	-0.522206415100942	0.0328694040263022	0.609231033265709	DOWN	-
Slc7a3	0.915501	0.0328746167506733	0.609231033265709	UP	-
Cox6b1	-0.881032829962166	0.0329553819666674	0.609231033265709	DOWN	-
Ech1	-1.26423	0.0329969460811435	0.609231033265709	DOWN	-
Rnu6	-0.564804	0.0330009572582071	0.609231033265709	DOWN	-
Mrpl27	-0.764642836591288	0.0330494393808985	0.609231033265709	DOWN	-
AI661453	0.699690886824059	0.0332157661431884	0.609231033265709	UP	-
Prrc2b	0.717751174890664	0.0332328038920006	0.609231033265709	UP	-
Rtp4	0.782187278920881	0.0332751756514131	0.609231033265709	UP	-
Uros	-0.547984884108344	0.0333060069731277	0.609231033265709	DOWN	-
Rnps1	0.629902414795599	0.0333157895351941	0.609231033265709	UP	-
Pts	-0.738773228865835	0.0334266911827989	0.609231033265709	DOWN	-
Chst2	0.749582148263561	0.0334839664638844	0.609231033265709	UP	-
Setd3	-0.539717473281169	0.0335808467945081	0.609231033265709	DOWN	-
Rbm15	0.543607034899025	0.0336305182729856	0.609231033265709	UP	-
Mrps28	-0.695436598493782	0.033640568176721	0.609231033265709	DOWN	-
Bola3	-0.761708221598212	0.0337080982345592	0.609231033265709	DOWN	TF
Pvrl3	-0.515647751609631	0.0338214096193316	0.609231033265709	DOWN	-
Emc9	-0.530664666952969	0.0338989178213457	0.609231033265709	DOWN	-
Sepn1	0.673943466207567	0.0339071128469684	0.609231033265709	UP	-
Atp5e	-0.931411	0.0339122184335621	0.609231033265709	DOWN	-
Ascl3	0.599770140061892	0.0339926661139655	0.609231033265709	UP	TF
Wiz	0.937169	0.0340175316759611	0.609231033265709	UP	TF
Mrpl9	-0.776119387269237	0.0340965707768261	0.609231033265709	DOWN	-
Col28a1	-0.565751115984303	0.0341304910356627	0.609231033265709	DOWN	-
Sfn	0.704787962294862	0.0341358069226574	0.609231033265709	UP	-
Mcee	-0.724843707294901	0.0341942055492859	0.609231033265709	DOWN	-
Atp5j2	-1.03757	0.0342680213541574	0.609231033265709	DOWN	-
Orai1	0.707155	0.0344592545306221	0.609231033265709	UP	-
Tmem180	0.659843193457158	0.0344598105265339	0.609231033265709	UP	-
Ccdc144b	-0.532981098601708	0.0345511367245528	0.609231033265709	DOWN	-
Hs3st3a1	0.707080258867067	0.0347071643329325	0.609231033265709	UP	-
Clgn	-0.538863813429611	0.0347787017506561	0.609231033265709	DOWN	-
Samd4b	0.883300569321627	0.0348960930304047	0.609231033265709	UP	-
Trim28	0.505920807854464	0.0349793626434528	0.609231033265709	UP	-
Hist1h2ah	-0.795331602020916	0.0349976093034315	0.609231033265709	DOWN	-
F10	0.527860097950569	0.0350517903745673	0.609231033265709	UP	-
Klf9	0.526020140654332	0.035100058121519	0.609231033265709	UP	TF
Figf	0.638508820357822	0.0353840093452482	0.609231033265709	UP	-
Abat	0.542667055498899	0.0354235634127686	0.609231033265709	UP	-
Etv5	0.676082154459923	0.0354559195445761	0.609231033265709	UP	TF
Zyx	0.627803200671698	0.0354875654056147	0.609231033265709	UP	-
Gdf10	0.647685782829199	0.0355031394684723	0.609231033265709	UP	-
Hbb-b2	-1.12575	0.0355254884576349	0.609231033265709	DOWN	-
Atl2	-0.506625744799859	0.0355639067845477	0.609231033265709	DOWN	-
Rfwd2	-0.577358009365106	0.0356099727691601	0.609231033265709	DOWN	-
Efna1	0.583414989724419	0.0356376174752871	0.609231033265709	UP	-
Idh2	-0.815792977152003	0.0356953071914713	0.609231033265709	DOWN	-
Pcyox1	-0.519487872907135	0.0357183959427844	0.609231033265709	DOWN	-
Eif3c	-0.729808860256604	0.0357623071336878	0.609231033265709	DOWN	-
Anpep	0.755037800411512	0.0357635359039969	0.609231033265709	UP	-
Ndufc2	-0.670356485675499	0.0357643743114742	0.609231033265709	DOWN	-
Th	0.516826863139782	0.0357947673511888	0.609231033265709	UP	-
Poc1b	0.536478804729649	0.035816813905332	0.609231033265709	UP	-
Pigt	0.719714	0.0358325399139331	0.609231033265709	UP	-
Trim32	0.532449825892699	0.0358638694380492	0.609231033265709	UP	-
Psme4	-0.566023100215622	0.0358917050856687	0.609231033265709	DOWN	-
Tmem242	-0.832623193919741	0.0359075494299305	0.609231033265709	DOWN	-
Acad8	-0.531057572787074	0.0360421744637901	0.609231033265709	DOWN	-
Coro2b	0.908766967470865	0.0361133627591595	0.609231033265709	UP	-
Lyrm2	-0.638727100712644	0.0361303735296115	0.609231033265709	DOWN	-
Vat1	0.546849763869544	0.0361321873973424	0.609231033265709	UP	-
Syne4	0.561868768314732	0.0361521760725537	0.609231033265709	UP	-
Osbpl6	-0.514043568512103	0.0361587061207929	0.609231033265709	DOWN	-
Ergic1	0.564456249582799	0.0361648	0.609231033265709	UP	-
Mfsd10	0.557869248714492	0.0361950450137062	0.609231033265709	UP	-
Ptges	0.537946525937513	0.0362020456340685	0.609231033265709	UP	-
Gmds	0.531264190475464	0.0362200821409365	0.609231033265709	UP	-
Commd2	-0.514990554088491	0.0362469107942999	0.609231033265709	DOWN	-
Nqo2	-0.582057	0.0363197871155473	0.609231033265709	DOWN	-
Gnpda2	-0.972949085988183	0.0363432847512648	0.609231033265709	DOWN	-
Emc2	-0.716157060118134	0.0363723416899079	0.609231033265709	DOWN	-
9530091C08Rik	-0.549363621821034	0.0364554447792622	0.609231033265709	DOWN	-
Chd5	0.531677463530268	0.0364636754630357	0.609231033265709	UP	-
Slc6a12	0.698352421831647	0.036478912767415	0.609231033265709	UP	-
Ttn	-0.842864781731369	0.0365776215085889	0.609231033265709	DOWN	-
Fbxo46	0.562332869589103	0.0366710330137727	0.609231033265709	UP	-
Abcg1	0.714407943580437	0.0366987559703898	0.609231033265709	UP	-
Hspe1	-0.734613	0.0366987780821327	0.609231033265709	DOWN	-
Pepd	0.504559980774568	0.0367197623014291	0.609231033265709	UP	-
Cers4	-0.544074300093362	0.0367424658663092	0.609231033265709	DOWN	-
Rsrc2	-0.774513229744124	0.0368097045345008	0.609231033265709	DOWN	-
Vezf1	0.506979832053098	0.0368999535585538	0.609231033265709	UP	TF
Psmd14	-0.649339064533792	0.036936902615782	0.609231033265709	DOWN	-
Lrg1	1.36232	0.0369445893817713	0.609231033265709	UP	-
Ehbp1l1	-0.993923207908128	0.0370514020117485	0.609231033265709	DOWN	-
Hykk	-0.569950937163825	0.0371123363184979	0.609231033265709	DOWN	-
Dcun1d5	-0.625511338819732	0.037125886220714	0.609231033265709	DOWN	-
Sema5a	0.512730462732399	0.0371515050680558	0.609231033265709	UP	-
Kng2	-0.884731138764704	0.0371603210083906	0.609231033265709	DOWN	-
Zfhx2	0.745620593621331	0.0373125873983199	0.609231033265709	UP	TF
Krt17	1.06326	0.0373353678425073	0.609231033265709	UP	-
Atat1	0.715653884459896	0.037394275249898	0.609231033265709	UP	-
Itga3	0.583083466422199	0.0373992809158258	0.609231033265709	UP	-
Sepp1	-0.673091941292901	0.0374119159090053	0.609231033265709	DOWN	-
Sp5	0.674198384654495	0.0374547443830107	0.609231033265709	UP	TF
Sh3bgrl3	0.697291935058799	0.0376731455054479	0.609231033265709	UP	-
A230050P20Rik	0.519659592977731	0.0376965928156681	0.609231033265709	UP	-
Cxcr2	0.664064023829402	0.0377101920617235	0.609231033265709	UP	-
Lsm8	-0.590373546943631	0.0377142655740038	0.609231033265709	DOWN	-
Itpr3	0.503286868164925	0.0377691377382082	0.609231033265709	UP	-
Retsat	-0.559363487459569	0.0377739295826197	0.609231033265709	DOWN	-
Hspb3	-0.720453560137481	0.0379017465917554	0.609231033265709	DOWN	-
Smpx	-0.757875995435856	0.0380046075269551	0.609231033265709	DOWN	-
Ccdc134	0.515660285921623	0.0381019867085797	0.609231033265709	UP	-
Dhx58	0.792658581538322	0.0381189388174005	0.609231033265709	UP	-
Tle1	0.625629	0.0381723094414955	0.609231033265709	UP	-
Gypa	-1.10009	0.0381907160426641	0.609231033265709	DOWN	-
Acsl1	-0.928795675509147	0.0382284020330827	0.609231033265709	DOWN	-
Proser3	0.698251172829094	0.0382288032241358	0.609231033265709	UP	-
Ralbp1	0.553050109362199	0.0383060055983689	0.609231033265709	UP	-
BC002163	-0.514356084585202	0.0383258423404919	0.609231033265709	DOWN	-
Ino80b	0.575976861542002	0.0383851430207889	0.609231033265709	UP	-
Adora2b	0.642797069996349	0.0385251972253996	0.609231033265709	UP	-
Ccl5	0.859647826908065	0.0385852200816413	0.609231033265709	UP	-
Trpc2	0.507454994920894	0.0386394518341643	0.609231033265709	UP	-
Aifm1	-0.553554295352144	0.038669036644565	0.609231033265709	DOWN	-
Cln3	0.545927505386066	0.0388840306130205	0.609231033265709	UP	-
Mup1	1.65307	0.0389499159899107	0.609231033265709	UP	-
Tmem107	0.531944827101781	0.0391794842350623	0.609231033265709	UP	-
Selplg	0.586186044100672	0.0392003808164475	0.609231033265709	UP	-
Aqp7	-0.636762821917745	0.0392157140343926	0.609231033265709	DOWN	-
Lpcat3	-0.512762284601987	0.0392386319393892	0.609231033265709	DOWN	-
Atad1	-0.673762	0.0393067139924502	0.609231033265709	DOWN	-
Sec14l1	0.526488040428775	0.0394353241915428	0.609231033265709	UP	-
Muc1	0.549097975102832	0.0394887506973476	0.609231033265709	UP	-
Gjb3	0.557378509967099	0.0395011888741775	0.609231033265709	UP	-
Arl16	-0.619109803001958	0.0395018661792403	0.609231033265709	DOWN	-
Clmn	0.642061190673772	0.0395325680033404	0.609231033265709	UP	-
Reep4	0.515586092415524	0.0397103585139754	0.609231033265709	UP	-
Ufsp2	-0.523672	0.0397252408084858	0.609231033265709	DOWN	-
Gm5512	-0.515377	0.0397298538855859	0.609231033265709	DOWN	-
Btbd11	0.569961672214866	0.0397756279896483	0.609231033265709	UP	-
Ackr2	0.695290526084191	0.0397769210583168	0.609231033265709	UP	-
Taf15	0.552548028545027	0.0400359056988756	0.609231033265709	UP	-
Cd3e	0.685617696602933	0.0400753962679035	0.609231033265709	UP	-
Mff	-0.527354171783218	0.0400926958109862	0.609231033265709	DOWN	-
Atp10a	0.628213210389218	0.0401728515183478	0.609231033265709	UP	-
Reep6	0.584961257017618	0.0402118693353464	0.609231033265709	UP	-
Igf2bp3	-0.537354692573319	0.0402266283347313	0.609231033265709	DOWN	-
Prelp	0.556918288679863	0.0402583919294648	0.609231033265709	UP	-
Mpp2	0.656695834737146	0.0402947523028881	0.609231033265709	UP	-
Ndufv2	-0.908426408066002	0.0404043477568058	0.609231033265709	DOWN	-
Ndufc1	-0.556161374526069	0.0404247938217339	0.609231033265709	DOWN	-
Vwf	0.905436144429498	0.0406555529623566	0.609231033265709	UP	-
Slc12a8	0.867588902029981	0.0406655298944734	0.609231033265709	UP	-
Nktr	-0.550443887453293	0.0407219467856993	0.609231033265709	DOWN	-
Mst1r	0.546068381112525	0.0407381231932533	0.609231033265709	UP	-
Mettl20	-0.511757136926416	0.0408898601842338	0.609231033265709	DOWN	-
Pdlim5	-0.652202229509811	0.0408913352304365	0.609231033265709	DOWN	-
Btbd1	-0.518961	0.0409922323857598	0.609231033265709	DOWN	-
Amd2	-0.522252768232375	0.0410495058589868	0.609231033265709	DOWN	-
Csde1	-0.706699	0.041060377642328	0.609231033265709	DOWN	-
Tpsb2	0.522114992610035	0.041102128789288	0.609231033265709	UP	-
Ddr2	0.630852341199713	0.0412522714064684	0.609830358068847	UP	-
Tns4	1.05024	0.0413235484184203	0.609830358068847	UP	-
Spef1	0.541225177052719	0.0413897560513303	0.609830358068847	UP	-
Atp5f1	-0.783213097916001	0.0414620414598248	0.609830358068847	DOWN	-
Pacrg	0.509021340619191	0.0415599830521772	0.610278683082539	UP	-
Tjp2	0.607195595250516	0.0416712540077956	0.610374814213359	UP	-
Uqcrc2	-0.814235904745235	0.0418450115803445	0.610880969515929	DOWN	-
Meox2	-0.535425625896044	0.0419034127230959	0.610880969515929	DOWN	TF
Ubxn11	0.517724269887049	0.0419225203443216	0.610880969515929	UP	-
Hbb-bt	-1.00411	0.0419599995769677	0.610880969515929	DOWN	-
Dab2	0.892612205982531	0.042093153538079	0.610880969515929	UP	-
Efna5	0.577307740721932	0.0421875787180774	0.610880969515929	UP	-
Lias	-0.587915026462437	0.0422589181152859	0.610880969515929	DOWN	-
Rfx1	0.619628613312091	0.0423167860567308	0.610880969515929	UP	TF
Gabpb2	-0.632533069996082	0.0424168068389441	0.610880969515929	DOWN	TF
Rfx4	0.554642179267405	0.0424254258403983	0.610880969515929	UP	TF
Scara3	0.517209147346031	0.0425780516403254	0.610880969515929	UP	-
Aaas	0.509708674694036	0.0426794445461796	0.610880969515929	UP	-
Slc22a17	0.560747116195799	0.042693529133283	0.610880969515929	UP	-
Lce3f	1.35259	0.0427111001001231	0.610880969515929	UP	-
Exog	0.529657960576886	0.0427520163202818	0.610880969515929	UP	-
Mab21l2	0.587368014658429	0.0427935373425764	0.610880969515929	UP	-
Uqcr10	-0.846905242948836	0.0428747696347334	0.610880969515929	DOWN	-
Papd7	0.580370462459191	0.0429131603143057	0.610880969515929	UP	-
Ahcyl1	-0.716427174893734	0.0429987358522292	0.610880969515929	DOWN	-
Mettl21c	-1.48066	0.0430072788701322	0.610880969515929	DOWN	-
Wnt4	0.548689278132425	0.0430495624377706	0.610880969515929	UP	-
Bmp4	0.800068464644955	0.0430525044687892	0.610880969515929	UP	-
Myrip	0.760536590921367	0.0431403618707306	0.610880969515929	UP	-
Ddost	0.526584559201698	0.0431501565281715	0.610880969515929	UP	-
Fxyd3	0.502672878901465	0.0431994065333815	0.610880969515929	UP	-
Hist2h3b	-0.652912549382735	0.0436397262381313	0.613374577170439	DOWN	-
Otof	0.545437412652666	0.0437039303958035	0.613374577170439	UP	-
Cd59b	-0.606617524978984	0.0437099470267132	0.613374577170439	DOWN	-
Polr2g	-0.834045	0.0437598478460667	0.613374577170439	DOWN	-
Pgc	0.521349632876925	0.0438334858761207	0.613374577170439	UP	-
Bglap	-1.08183	0.0441741376541584	0.613374577170439	DOWN	-
Fbn1	-0.608967157683301	0.0443159524666815	0.613374577170439	DOWN	-
Itga5	0.534634894761455	0.0443267875478392	0.613374577170439	UP	-
H2-Ab1	0.866926109530451	0.0443282214969176	0.613374577170439	UP	-
2010107E04Rik	-0.794916560003035	0.0445257348903048	0.613374577170439	DOWN	-
Alg2	0.764585221322935	0.0445280506844362	0.613374577170439	UP	-
Cpxm1	-0.589691017724864	0.044551191389549	0.613374577170439	DOWN	-
Myl12a	0.609119685505305	0.0445831201242715	0.613374577170439	UP	-
Cdk5r1	0.518862954818064	0.0445921324650046	0.613374577170439	UP	-
Myoz1	-1.00389	0.0446218330353363	0.613374577170439	DOWN	-
Adra2a	0.628918975366899	0.0446731819604487	0.613374577170439	UP	-
Arfgef3	0.742755838864199	0.0447023977155436	0.613374577170439	UP	-
Nkx6-1	0.756062461837983	0.0449953808545999	0.613479925465066	UP	TF
Gdnf	0.694282125660158	0.0450398376576599	0.613479925465066	UP	-
1810055G02Rik	0.695111988540298	0.0450690740392577	0.613479925465066	UP	-
Hapln4	0.700671057163703	0.0451124432239758	0.613479925465066	UP	-
Clec4a1	0.533838459037868	0.0452132164441671	0.613479925465066	UP	-
Wasf1	0.880332427625264	0.0452554885724875	0.613479925465066	UP	-
Ctse	-0.745738124732486	0.0452869796398417	0.613479925465066	DOWN	-
Ankrd34a	0.557347968050604	0.0456096000281324	0.616752771657283	UP	-
Psma4	-0.872497028664569	0.0456558892769843	0.616752771657283	DOWN	-
Zzz3	-0.510314523113409	0.0457025751425558	0.616752771657283	DOWN	TF
Bglap3	-1.09685	0.0460859573420308	0.618854234129368	DOWN	-
Mospd3	0.638160430880629	0.0461722713633213	0.619162589757325	UP	-
Sirpa	0.650831089202232	0.0462393416571452	0.619279808769275	UP	-
Ndufa7	-0.608382985578467	0.0463396019292134	0.619279808769275	DOWN	-
Gria1	-0.574248918677152	0.0464721917808804	0.619279808769275	DOWN	-
Arsb	0.651756928961764	0.0465405907277215	0.619415071087097	UP	-
Scel	0.783069909367445	0.0467788419995898	0.619479073080993	UP	-
Ch25h	0.915733433863572	0.046811332316562	0.619479073080993	UP	-
Triap1	-0.509106419797502	0.0468321023346314	0.619479073080993	DOWN	-
Smn1	0.513478497974997	0.0468764437187585	0.619479073080993	UP	-
Vwa3a	0.512787366300747	0.0469177873357424	0.619479073080993	UP	-
Ruvbl2	0.569267560121204	0.0470315273324102	0.619479073080993	UP	-
Lbh	0.517689	0.0471855845521015	0.620236719563717	UP	-
Ptcd3	-0.637069910802737	0.0474996733189855	0.620695160888992	DOWN	-
Mrgprf	0.821483	0.0475057313655097	0.620695160888992	UP	-
Aco2	-0.604360198670969	0.0475087835343714	0.620695160888992	DOWN	-
Lpar4	-0.738378152000813	0.0475865492561163	0.620695160888992	DOWN	-
Mapkbp1	0.508808624031407	0.0476303551720577	0.620695160888992	UP	-
Camsap3	0.532125304724088	0.0476505372575584	0.620695160888992	UP	-
Aff1	0.577961488533498	0.0478157508293018	0.620695160888992	UP	TF
Tpp1	0.511974266183121	0.0479208883853548	0.620695160888992	UP	-
Cabs1	2.77765	0.048027045132294	0.621313379485176	UP	-
Lgals9	0.557130767364055	0.0481626184805749	0.621777617986937	UP	-
Chil1	1.19346	0.0482281785625485	0.621777617986937	UP	-
Trim62	0.738680703399055	0.0482383425652833	0.621777617986937	UP	-
Sync	-0.566630457460764	0.0487337825463627	0.625196916356874	DOWN	-
Sepw1	0.659772338548435	0.0487387853733166	0.625196916356874	UP	-
Slc13a3	0.708061074494352	0.0490908981696287	0.626907684821174	UP	-
Wdr45b	-0.528189619021698	0.0491185856056569	0.626907684821174	DOWN	-
Tmem106b	-0.605981867429684	0.0491669182942316	0.626907684821174	DOWN	-
Trp53i11	0.708075637182809	0.049332110645217	0.627871783991214	UP	-
Aqp4	-0.780960704680305	0.0493606179628226	0.627871783991214	DOWN	-
Mpc2	-0.500942551071847	0.0496023139736258	0.628659777608723	DOWN	-
Slmo2	-0.557102088370701	0.0496164378164561	0.628659777608723	DOWN	-
